# Supplementary material for: The human cerebellum is essential for modulating perceptual sensitivity based on temporal expectations
Source: eLife. 2021 Jun 24;10:e66743. doi: 10.7554/eLife.66743 (PMC8245126; doi:10.7554/eLife.66743)
Supplement: Source data 1. [file elife-66743-data1.xlsx]

## Sheet: Sheet1
subject_number	group	block	trial	condition	cue_interval	target_interval	validity	target_orientation	orientation_judgment
1	1	1	1	1	1	1	1	1	1
1	1	1	2	1	1	1	1	1	1
1	1	1	3	1	2	2	1	0	0
1	1	1	4	1	1	2	2	0	1
1	1	1	5	1	1	1	1	1	1
1	1	1	6	1	1	1	1	0	0
1	1	1	7	1	1	1	1	0	0
1	1	1	8	1	2	0	0	1	0
1	1	1	9	1	2	1	2	1	1
1	1	1	10	1	1	0	0	0	0
1	1	1	11	1	1	0	0	1	0
1	1	1	12	1	2	2	1	1	1
1	1	1	13	1	1	2	2	1	1
1	1	1	14	1	2	2	1	1	1
1	1	1	15	1	2	1	2	0	1
1	1	1	16	1	2	2	1	1	0
1	1	1	17	1	1	2	2	0	0
1	1	1	18	1	2	2	1	0	0
1	1	1	19	1	2	1	2	1	1
1	1	1	20	1	1	1	1	0	1
1	1	1	21	1	1	1	1	1	1
1	1	1	22	1	2	2	1	1	1
1	1	1	23	1	2	2	1	0	1
1	1	1	24	1	2	2	1	0	1
1	1	1	25	1	1	1	1	1	1
1	1	1	26	1	1	2	2	1	1
1	1	1	27	1	2	2	1	0	1
1	1	1	28	1	1	1	1	0	0
1	1	1	29	1	2	2	1	1	0
1	1	1	30	1	2	1	2	0	1
1	1	1	31	1	2	0	0	0	0
1	1	1	32	1	1	1	1	0	1
1	1	2	1	2	1	1	1	1	1
1	1	2	2	2	1	1	1	0	1
1	1	2	3	2	1	1	1	0	1
1	1	2	4	2	2	1	2	0	1
1	1	2	5	2	2	2	1	1	1
1	1	2	6	2	2	1	2	1	1
1	1	2	7	2	2	0	0	1	0
1	1	2	8	2	1	2	2	1	1
1	1	2	9	2	2	0	0	0	0
1	1	2	10	2	2	2	1	0	1
1	1	2	11	2	2	2	1	0	1
1	1	2	12	2	2	2	1	1	1
1	1	2	13	2	1	2	2	0	1
1	1	2	14	2	1	1	1	1	1
1	1	2	15	2	1	2	2	1	1
1	1	2	16	2	2	2	1	1	1
1	1	2	17	2	2	1	2	0	1
1	1	2	18	2	1	1	1	1	1
1	1	2	19	2	1	1	1	1	1
1	1	2	20	2	2	2	1	0	0
1	1	2	21	2	1	0	0	1	0
1	1	2	22	2	1	1	1	0	1
1	1	2	23	2	2	1	2	1	1
1	1	2	24	2	2	2	1	1	1
1	1	2	25	2	1	1	1	0	1
1	1	2	26	2	2	2	1	0	1
1	1	2	27	2	2	2	1	1	1
1	1	2	28	2	1	2	2	0	1
1	1	2	29	2	2	2	1	0	0
1	1	2	30	2	1	0	0	0	0
1	1	2	31	2	1	1	1	0	1
1	1	2	32	2	1	1	1	1	1
1	1	3	1	1	2	2	1	0	0
1	1	3	2	1	1	1	1	1	1
1	1	3	3	1	1	1	1	1	1
1	1	3	4	1	2	1	2	1	1
1	1	3	5	1	2	2	1	1	0
1	1	3	6	1	2	0	0	0	0
1	1	3	7	1	2	2	1	1	1
1	1	3	8	1	2	2	1	0	0
1	1	3	9	1	2	1	2	0	0
1	1	3	10	1	2	2	1	1	0
1	1	3	11	1	1	2	2	1	1
1	1	3	12	1	1	0	0	1	0
1	1	3	13	1	2	1	2	0	0
1	1	3	14	1	1	1	1	0	0
1	1	3	15	1	2	2	1	0	0
1	1	3	16	1	2	2	1	0	1
1	1	3	17	1	1	1	1	0	0
1	1	3	18	1	2	1	2	1	1
1	1	3	19	1	2	2	1	1	1
1	1	3	20	1	1	2	2	0	0
1	1	3	21	1	1	1	1	0	0
1	1	3	22	1	2	2	1	1	1
1	1	3	23	1	1	2	2	1	1
1	1	3	24	1	1	1	1	1	1
1	1	3	25	1	1	0	0	0	0
1	1	3	26	1	1	1	1	1	1
1	1	3	27	1	1	1	1	0	0
1	1	3	28	1	1	2	2	0	0
1	1	3	29	1	1	1	1	1	0
1	1	3	30	1	1	1	1	0	0
1	1	3	31	1	2	2	1	0	0
1	1	3	32	1	2	0	0	1	0
1	1	4	1	2	2	2	1	1	1
1	1	4	2	2	2	2	1	1	0
1	1	4	3	2	1	1	1	1	1
1	1	4	4	2	2	1	2	0	0
1	1	4	5	2	2	0	0	1	0
1	1	4	6	2	1	2	2	0	1
1	1	4	7	2	1	1	1	0	0
1	1	4	8	2	2	1	2	1	1
1	1	4	9	2	2	2	1	0	0
1	1	4	10	2	1	1	1	1	0
1	1	4	11	2	1	1	1	1	1
1	1	4	12	2	1	0	0	0	0
1	1	4	13	2	2	2	1	0	0
1	1	4	14	2	2	2	1	0	0
1	1	4	15	2	2	2	1	1	1
1	1	4	16	2	1	2	2	1	1
1	1	4	17	2	2	2	1	0	1
1	1	4	18	2	1	1	1	0	1
1	1	4	19	2	1	1	1	0	1
1	1	4	20	2	1	2	2	0	1
1	1	4	21	2	2	2	1	1	1
1	1	4	22	2	2	1	2	0	1
1	1	4	23	2	1	1	1	0	1
1	1	4	24	2	2	2	1	0	1
1	1	4	25	2	2	2	1	1	1
1	1	4	26	2	1	1	1	1	1
1	1	4	27	2	1	1	1	1	1
1	1	4	28	2	1	0	0	1	0
1	1	4	29	2	2	0	0	0	0
1	1	4	30	2	2	1	2	1	1
1	1	4	31	2	1	1	1	0	1
1	1	4	32	2	1	2	2	1	1
1	1	5	1	1	2	2	1	1	1
1	1	5	2	1	1	1	1	1	1
1	1	5	3	1	2	2	1	1	1
1	1	5	4	1	2	2	1	0	1
1	1	5	5	1	1	1	1	0	0
1	1	5	6	1	2	0	0	1	0
1	1	5	7	1	2	1	2	0	0
1	1	5	8	1	2	2	1	0	0
1	1	5	9	1	2	2	1	1	1
1	1	5	10	1	1	2	2	1	1
1	1	5	11	1	2	2	1	0	0
1	1	5	12	1	1	1	1	0	0
1	1	5	13	1	1	1	1	1	1
1	1	5	14	1	1	2	2	1	1
1	1	5	15	1	1	1	1	0	0
1	1	5	16	1	1	1	1	0	0
1	1	5	17	1	1	2	2	0	1
1	1	5	18	1	2	2	1	1	1
1	1	5	19	1	1	2	2	0	1
1	1	5	20	1	1	1	1	0	0
1	1	5	21	1	1	0	0	1	0
1	1	5	22	1	2	1	2	1	1
1	1	5	23	1	1	1	1	1	1
1	1	5	24	1	1	1	1	1	1
1	1	5	25	1	2	1	2	1	1
1	1	5	26	1	1	1	1	1	1
1	1	5	27	1	2	0	0	0	0
1	1	5	28	1	2	2	1	1	1
1	1	5	29	1	1	0	0	0	0
1	1	5	30	1	2	2	1	0	0
1	1	5	31	1	2	1	2	0	0
1	1	5	32	1	2	2	1	0	0
1	1	6	1	2	1	1	1	1	1
1	1	6	2	2	1	1	1	0	0
1	1	6	3	2	1	1	1	0	1
1	1	6	4	2	1	2	2	1	1
1	1	6	5	2	2	2	1	1	1
1	1	6	6	2	2	0	0	1	0
1	1	6	7	2	2	1	2	0	1
1	1	6	8	2	2	2	1	0	1
1	1	6	9	2	1	2	2	0	0
1	1	6	10	2	1	1	1	0	0
1	1	6	11	2	1	1	1	1	0
1	1	6	12	2	2	1	2	1	0
1	1	6	13	2	1	1	1	1	1
1	1	6	14	2	2	1	2	0	1
1	1	6	15	2	1	1	1	0	0
1	1	6	16	2	1	1	1	1	0
1	1	6	17	2	2	2	1	1	1
1	1	6	18	2	2	1	2	1	1
1	1	6	19	2	2	2	1	1	1
1	1	6	20	2	2	2	1	0	0
1	1	6	21	2	2	2	1	0	1
1	1	6	22	2	1	0	0	1	0
1	1	6	23	2	2	2	1	1	1
1	1	6	24	2	2	0	0	0	0
1	1	6	25	2	2	2	1	0	1
1	1	6	26	2	1	2	2	0	1
1	1	6	27	2	1	1	1	1	1
1	1	6	28	2	1	1	1	0	1
1	1	6	29	2	2	2	1	1	1
1	1	6	30	2	2	2	1	0	1
1	1	6	31	2	1	2	2	1	1
1	1	6	32	2	1	0	0	0	0
1	1	7	1	1	2	2	1	1	1
1	1	7	2	1	1	1	1	0	0
1	1	7	3	1	2	2	1	1	1
1	1	7	4	1	2	1	2	0	0
1	1	7	5	1	2	2	1	1	1
1	1	7	6	1	1	2	2	1	1
1	1	7	7	1	1	1	1	0	0
1	1	7	8	1	1	2	2	0	1
1	1	7	9	1	1	1	1	1	1
1	1	7	10	1	1	0	0	0	0
1	1	7	11	1	1	0	0	1	0
1	1	7	12	1	2	2	1	0	1
1	1	7	13	1	2	1	2	1	1
1	1	7	14	1	2	2	1	0	1
1	1	7	15	1	2	2	1	0	1
1	1	7	16	1	2	1	2	0	1
1	1	7	17	1	2	2	1	1	1
1	1	7	18	1	1	1	1	0	1
1	1	7	19	1	2	2	1	0	1
1	1	7	20	1	2	0	0	1	0
1	1	7	21	1	1	1	1	1	1
1	1	7	22	1	1	1	1	1	1
1	1	7	23	1	1	1	1	0	1
1	1	7	24	1	1	2	2	1	1
1	1	7	25	1	1	1	1	1	1
1	1	7	26	1	2	2	1	1	1
1	1	7	27	1	1	2	2	0	1
1	1	7	28	1	1	1	1	1	1
1	1	7	29	1	2	0	0	0	0
1	1	7	30	1	2	1	2	1	1
1	1	7	31	1	1	1	1	0	1
1	1	7	32	1	2	2	1	0	1
1	1	8	1	2	1	1	1	0	1
1	1	8	2	2	2	2	1	0	1
1	1	8	3	2	2	2	1	1	1
1	1	8	4	2	1	1	1	0	1
1	1	8	5	2	2	1	2	0	1
1	1	8	6	2	1	0	0	0	0
1	1	8	7	2	1	2	2	0	1
1	1	8	8	2	1	1	1	1	1
1	1	8	9	2	1	1	1	1	1
1	1	8	10	2	1	1	1	1	1
1	1	8	11	2	1	1	1	0	1
1	1	8	12	2	2	2	1	0	1
1	1	8	13	2	1	1	1	0	0
1	1	8	14	2	2	2	1	1	1
1	1	8	15	2	1	1	1	1	0
1	1	8	16	2	2	2	1	0	0
1	1	8	17	2	1	2	2	1	1
1	1	8	18	2	1	1	1	0	1
1	1	8	19	2	1	2	2	0	1
1	1	8	20	2	2	0	0	1	0
1	1	8	21	2	2	1	2	1	1
1	1	8	22	2	1	1	1	1	1
1	1	8	23	2	2	2	1	0	1
1	1	8	24	2	2	2	1	1	0
1	1	8	25	2	1	2	2	1	1
1	1	8	26	2	2	2	1	1	1
1	1	8	27	2	2	0	0	0	0
1	1	8	28	2	2	2	1	1	1
1	1	8	29	2	2	1	2	0	1
1	1	8	30	2	1	0	0	1	0
1	1	8	31	2	2	1	2	1	1
1	1	8	32	2	2	2	1	0	1
2	1	1	1	1	2	2	1	0	1
2	1	1	2	1	1	1	1	0	0
2	1	1	3	1	2	2	1	1	1
2	1	1	4	1	2	2	1	0	0
2	1	1	5	1	2	2	1	1	1
2	1	1	6	1	2	1	2	1	1
2	1	1	7	1	1	1	1	0	0
2	1	1	8	1	2	1	2	0	0
2	1	1	9	1	2	2	1	0	1
2	1	1	10	1	1	1	1	1	1
2	1	1	11	1	1	2	2	0	0
2	1	1	12	1	2	0	0	0	0
2	1	1	13	1	2	2	1	1	1
2	1	1	14	1	1	1	1	1	1
2	1	1	15	1	1	2	2	1	1
2	1	1	16	1	2	0	0	1	0
2	1	1	17	1	1	1	1	1	1
2	1	1	18	1	1	1	1	1	1
2	1	1	19	1	2	1	2	1	1
2	1	1	20	1	2	2	1	0	0
2	1	1	21	1	1	2	2	0	1
2	1	1	22	1	2	2	1	1	1
2	1	1	23	1	1	2	2	1	1
2	1	1	24	1	1	0	0	0	0
2	1	1	25	1	1	0	0	1	0
2	1	1	26	1	2	1	2	0	0
2	1	1	27	1	2	2	1	0	0
2	1	1	28	1	2	2	1	1	1
2	1	1	29	1	1	1	1	1	1
2	1	1	30	1	1	1	1	0	0
2	1	1	31	1	1	1	1	0	1
2	1	1	32	1	1	1	1	0	0
2	1	2	1	2	2	2	1	0	0
2	1	2	2	2	2	2	1	0	1
2	1	2	3	2	1	1	1	1	1
2	1	2	4	2	1	2	2	1	1
2	1	2	5	2	2	2	1	1	0
2	1	2	6	2	1	1	1	0	0
2	1	2	7	2	2	1	2	1	1
2	1	2	8	2	2	2	1	1	1
2	1	2	9	2	1	2	2	1	0
2	1	2	10	2	2	2	1	1	1
2	1	2	11	2	1	1	1	0	1
2	1	2	12	2	1	2	2	0	0
2	1	2	13	2	2	2	1	1	1
2	1	2	14	2	1	1	1	1	0
2	1	2	15	2	2	2	1	1	0
2	1	2	16	2	2	1	2	1	1
2	1	2	17	2	1	1	1	1	1
2	1	2	18	2	1	0	0	0	0
2	1	2	19	2	2	2	1	0	0
2	1	2	20	2	1	1	1	1	1
2	1	2	21	2	2	1	2	0	0
2	1	2	22	2	2	2	1	0	0
2	1	2	23	2	1	1	1	0	0
2	1	2	24	2	2	2	1	0	0
2	1	2	25	2	2	0	0	0	0
2	1	2	26	2	1	2	2	0	1
2	1	2	27	2	1	1	1	1	0
2	1	2	28	2	2	0	0	1	0
2	1	2	29	2	1	1	1	0	1
2	1	2	30	2	2	1	2	0	0
2	1	2	31	2	1	0	0	1	0
2	1	2	32	2	1	1	1	0	0
2	1	3	1	1	2	2	1	0	0
2	1	3	2	1	1	1	1	1	1
2	1	3	3	1	1	1	1	0	0
2	1	3	4	1	1	2	2	1	1
2	1	3	5	1	2	2	1	1	0
2	1	3	6	1	2	2	1	1	1
2	1	3	7	1	1	0	0	0	0
2	1	3	8	1	2	1	2	0	0
2	1	3	9	1	2	0	0	1	0
2	1	3	10	1	2	2	1	1	1
2	1	3	11	1	1	1	1	1	0
2	1	3	12	1	1	1	1	1	1
2	1	3	13	1	1	1	1	0	1
2	1	3	14	1	1	2	2	1	1
2	1	3	15	1	1	1	1	1	1
2	1	3	16	1	2	2	1	0	1
2	1	3	17	1	2	2	1	1	1
2	1	3	18	1	1	1	1	1	1
2	1	3	19	1	2	2	1	0	0
2	1	3	20	1	1	1	1	0	0
2	1	3	21	1	1	2	2	0	1
2	1	3	22	1	2	2	1	0	0
2	1	3	23	1	2	2	1	0	0
2	1	3	24	1	2	1	2	0	0
2	1	3	25	1	2	2	1	1	1
2	1	3	26	1	1	2	2	0	0
2	1	3	27	1	1	0	0	1	0
2	1	3	28	1	2	1	2	1	1
2	1	3	29	1	1	1	1	0	1
2	1	3	30	1	2	1	2	1	1
2	1	3	31	1	1	1	1	0	1
2	1	3	32	1	2	0	0	0	0
2	1	4	1	2	2	2	1	0	0
2	1	4	2	2	1	1	1	0	0
2	1	4	3	2	2	2	1	1	1
2	1	4	4	2	2	1	2	1	1
2	1	4	5	2	2	2	1	1	1
2	1	4	6	2	2	1	2	0	0
2	1	4	7	2	1	1	1	0	0
2	1	4	8	2	2	2	1	1	1
2	1	4	9	2	1	2	2	0	0
2	1	4	10	2	2	2	1	0	0
2	1	4	11	2	1	2	2	1	0
2	1	4	12	2	1	1	1	1	1
2	1	4	13	2	2	0	0	1	0
2	1	4	14	2	2	2	1	0	0
2	1	4	15	2	1	2	2	1	1
2	1	4	16	2	1	1	1	0	1
2	1	4	17	2	1	1	1	0	0
2	1	4	18	2	1	1	1	0	0
2	1	4	19	2	1	1	1	1	0
2	1	4	20	2	2	2	1	0	1
2	1	4	21	2	2	2	1	1	1
2	1	4	22	2	1	1	1	1	0
2	1	4	23	2	2	1	2	1	1
2	1	4	24	2	1	1	1	1	1
2	1	4	25	2	1	2	2	0	0
2	1	4	26	2	2	2	1	0	0
2	1	4	27	2	2	0	0	0	0
2	1	4	28	2	1	1	1	1	1
2	1	4	29	2	2	2	1	1	1
2	1	4	30	2	1	0	0	0	0
2	1	4	31	2	2	1	2	0	0
2	1	4	32	2	1	0	0	1	0
2	1	5	1	1	2	2	1	0	0
2	1	5	2	1	2	2	1	0	1
2	1	5	3	1	1	1	1	1	1
2	1	5	4	1	1	2	2	1	0
2	1	5	5	1	1	1	1	0	0
2	1	5	6	1	2	1	2	0	1
2	1	5	7	1	2	2	1	1	1
2	1	5	8	1	1	1	1	1	0
2	1	5	9	1	2	2	1	0	0
2	1	5	10	1	2	1	2	0	1
2	1	5	11	1	2	0	0	0	0
2	1	5	12	1	2	2	1	1	1
2	1	5	13	1	2	1	2	1	0
2	1	5	14	1	1	1	1	1	1
2	1	5	15	1	1	1	1	0	0
2	1	5	16	1	1	1	1	0	0
2	1	5	17	1	2	1	2	1	1
2	1	5	18	1	2	2	1	1	1
2	1	5	19	1	2	2	1	0	0
2	1	5	20	1	1	0	0	1	0
2	1	5	21	1	1	1	1	0	1
2	1	5	22	1	1	1	1	1	1
2	1	5	23	1	1	1	1	1	1
2	1	5	24	1	1	2	2	1	1
2	1	5	25	1	2	2	1	0	1
2	1	5	26	1	2	2	1	1	0
2	1	5	27	1	2	0	0	1	0
2	1	5	28	1	1	0	0	0	0
2	1	5	29	1	1	1	1	0	1
2	1	5	30	1	1	2	2	0	0
2	1	5	31	1	2	2	1	1	1
2	1	5	32	1	1	2	2	0	0
2	1	6	1	2	2	2	1	1	1
2	1	6	2	2	2	2	1	0	0
2	1	6	3	2	1	1	1	1	1
2	1	6	4	2	1	2	2	0	1
2	1	6	5	2	2	2	1	1	1
2	1	6	6	2	2	2	1	1	0
2	1	6	7	2	2	1	2	1	0
2	1	6	8	2	1	1	1	0	1
2	1	6	9	2	1	1	1	1	1
2	1	6	10	2	1	1	1	0	1
2	1	6	11	2	2	2	1	0	0
2	1	6	12	2	1	2	2	1	1
2	1	6	13	2	2	2	1	1	1
2	1	6	14	2	1	1	1	1	0
2	1	6	15	2	2	1	2	0	1
2	1	6	16	2	2	2	1	1	1
2	1	6	17	2	2	0	0	1	0
2	1	6	18	2	1	2	2	0	0
2	1	6	19	2	2	2	1	0	0
2	1	6	20	2	2	2	1	0	1
2	1	6	21	2	1	1	1	1	1
2	1	6	22	2	2	0	0	0	0
2	1	6	23	2	1	1	1	0	0
2	1	6	24	2	1	1	1	0	1
2	1	6	25	2	2	1	2	0	0
2	1	6	26	2	1	1	1	0	1
2	1	6	27	2	2	2	1	0	0
2	1	6	28	2	2	1	2	1	1
2	1	6	29	2	1	0	0	1	0
2	1	6	30	2	1	0	0	0	0
2	1	6	31	2	1	1	1	1	1
2	1	6	32	2	1	2	2	1	1
2	1	7	1	1	2	2	1	1	0
2	1	7	2	1	1	1	1	1	1
2	1	7	3	1	1	1	1	0	1
2	1	7	4	1	2	2	1	0	0
2	1	7	5	1	2	1	2	0	0
2	1	7	6	1	2	2	1	1	0
2	1	7	7	1	1	1	1	0	0
2	1	7	8	1	1	0	0	1	0
2	1	7	9	1	1	2	2	1	1
2	1	7	10	1	2	2	1	1	1
2	1	7	11	1	2	2	1	1	0
2	1	7	12	1	1	2	2	0	1
2	1	7	13	1	2	2	1	0	0
2	1	7	14	1	1	2	2	1	1
2	1	7	15	1	1	1	1	0	0
2	1	7	16	1	2	1	2	0	1
2	1	7	17	1	1	1	1	0	0
2	1	7	18	1	2	2	1	0	1
2	1	7	19	1	1	1	1	1	1
2	1	7	20	1	1	1	1	1	0
2	1	7	21	1	2	1	2	1	1
2	1	7	22	1	1	1	1	0	0
2	1	7	23	1	1	1	1	1	1
2	1	7	24	1	1	1	1	1	1
2	1	7	25	1	2	2	1	0	0
2	1	7	26	1	2	0	0	1	0
2	1	7	27	1	1	0	0	0	0
2	1	7	28	1	1	2	2	0	0
2	1	7	29	1	2	2	1	1	0
2	1	7	30	1	2	2	1	0	0
2	1	7	31	1	2	1	2	1	1
2	1	7	32	1	2	0	0	0	0
2	1	8	1	2	1	1	1	1	1
2	1	8	2	2	2	2	1	0	1
2	1	8	3	2	1	1	1	0	0
2	1	8	4	2	2	1	2	1	1
2	1	8	5	2	1	1	1	0	1
2	1	8	6	2	1	2	2	0	0
2	1	8	7	2	2	2	1	0	0
2	1	8	8	2	2	2	1	0	0
2	1	8	9	2	2	1	2	1	1
2	1	8	10	2	2	0	0	0	0
2	1	8	11	2	2	1	2	0	1
2	1	8	12	2	1	0	0	0	0
2	1	8	13	2	2	2	1	1	1
2	1	8	14	2	1	1	1	1	1
2	1	8	15	2	1	1	1	1	0
2	1	8	16	2	1	2	2	0	0
2	1	8	17	2	2	2	1	1	1
2	1	8	18	2	1	1	1	0	0
2	1	8	19	2	1	2	2	1	1
2	1	8	20	2	2	2	1	0	1
2	1	8	21	2	1	0	0	1	0
2	1	8	22	2	1	2	2	1	1
2	1	8	23	2	1	1	1	0	0
2	1	8	24	2	2	2	1	1	1
2	1	8	25	2	1	1	1	1	1
2	1	8	26	2	2	2	1	1	0
2	1	8	27	2	2	0	0	1	0
2	1	8	28	2	1	1	1	0	0
2	1	8	29	2	1	1	1	1	1
2	1	8	30	2	2	1	2	0	1
2	1	8	31	2	2	2	1	0	0
2	1	8	32	2	2	2	1	1	1
3	1	1	1	1	2	2	1	0	0
3	1	1	2	1	2	2	1	1	1
3	1	1	3	1	1	1	1	0	0
3	1	1	4	1	1	1	1	0	0
3	1	1	5	1	1	2	2	1	1
3	1	1	6	1	1	1	1	1	1
3	1	1	7	1	2	2	1	1	1
3	1	1	8	1	2	1	2	1	1
3	1	1	9	1	2	0	0	1	0
3	1	1	10	1	2	1	2	0	0
3	1	1	11	1	1	0	0	1	0
3	1	1	12	1	2	2	1	0	0
3	1	1	13	1	1	1	1	1	1
3	1	1	14	1	2	2	1	1	1
3	1	1	15	1	1	1	1	1	1
3	1	1	16	1	1	1	1	1	1
3	1	1	17	1	1	1	1	0	0
3	1	1	18	1	2	1	2	1	1
3	1	1	19	1	1	0	0	0	0
3	1	1	20	1	1	2	2	0	0
3	1	1	21	1	2	0	0	0	0
3	1	1	22	1	2	2	1	0	0
3	1	1	23	1	1	1	1	0	0
3	1	1	24	1	1	2	2	0	0
3	1	1	25	1	1	1	1	0	0
3	1	1	26	1	2	2	1	1	0
3	1	1	27	1	1	2	2	1	0
3	1	1	28	1	2	2	1	1	0
3	1	1	29	1	1	1	1	1	1
3	1	1	30	1	2	2	1	0	0
3	1	1	31	1	2	1	2	0	0
3	1	1	32	1	2	2	1	0	0
3	1	2	1	2	1	1	1	1	1
3	1	2	2	2	1	1	1	0	1
3	1	2	3	2	1	1	1	1	1
3	1	2	4	2	1	1	1	1	1
3	1	2	5	2	2	1	2	0	0
3	1	2	6	2	2	2	1	0	0
3	1	2	7	2	2	1	2	1	1
3	1	2	8	2	1	1	1	1	1
3	1	2	9	2	2	1	2	0	0
3	1	2	10	2	2	2	1	1	1
3	1	2	11	2	2	1	2	1	1
3	1	2	12	2	1	1	1	0	0
3	1	2	13	2	1	2	2	0	1
3	1	2	14	2	1	1	1	0	0
3	1	2	15	2	2	2	1	1	1
3	1	2	16	2	1	2	2	0	1
3	1	2	17	2	1	1	1	0	0
3	1	2	18	2	2	0	0	1	0
3	1	2	19	2	1	1	1	1	1
3	1	2	20	2	1	1	1	0	0
3	1	2	21	2	2	2	1	0	1
3	1	2	22	2	2	2	1	0	0
3	1	2	23	2	2	2	1	0	1
3	1	2	24	2	1	0	0	0	0
3	1	2	25	2	1	2	2	1	1
3	1	2	26	2	2	2	1	1	0
3	1	2	27	2	1	2	2	1	0
3	1	2	28	2	1	0	0	1	0
3	1	2	29	2	2	0	0	0	0
3	1	2	30	2	2	2	1	0	0
3	1	2	31	2	2	2	1	1	0
3	1	2	32	2	2	2	1	1	0
3	1	3	1	1	1	1	1	1	1
3	1	3	2	1	2	2	1	0	0
3	1	3	3	1	2	2	1	0	0
3	1	3	4	1	1	1	1	1	1
3	1	3	5	1	2	2	1	1	1
3	1	3	6	1	1	1	1	1	1
3	1	3	7	1	2	2	1	0	0
3	1	3	8	1	1	2	2	0	1
3	1	3	9	1	2	2	1	0	1
3	1	3	10	1	1	1	1	1	1
3	1	3	11	1	1	1	1	0	1
3	1	3	12	1	1	2	2	1	1
3	1	3	13	1	1	1	1	0	1
3	1	3	14	1	1	0	0	0	0
3	1	3	15	1	2	1	2	1	1
3	1	3	16	1	1	1	1	0	0
3	1	3	17	1	2	2	1	1	1
3	1	3	18	1	2	2	1	1	1
3	1	3	19	1	1	2	2	0	0
3	1	3	20	1	2	0	0	1	0
3	1	3	21	1	2	0	0	0	0
3	1	3	22	1	2	1	2	0	0
3	1	3	23	1	2	2	1	0	0
3	1	3	24	1	1	2	2	1	1
3	1	3	25	1	1	1	1	0	0
3	1	3	26	1	1	1	1	0	0
3	1	3	27	1	2	2	1	1	1
3	1	3	28	1	2	1	2	1	1
3	1	3	29	1	1	1	1	1	1
3	1	3	30	1	2	2	1	1	1
3	1	3	31	1	1	0	0	1	0
3	1	3	32	1	2	1	2	0	0
3	1	4	1	2	2	2	1	0	1
3	1	4	2	2	2	2	1	0	0
3	1	4	3	2	1	1	1	1	0
3	1	4	4	2	1	1	1	0	0
3	1	4	5	2	2	1	2	0	0
3	1	4	6	2	2	2	1	0	0
3	1	4	7	2	1	0	0	1	0
3	1	4	8	2	1	2	2	0	0
3	1	4	9	2	2	2	1	1	1
3	1	4	10	2	1	2	2	1	1
3	1	4	11	2	1	0	0	0	0
3	1	4	12	2	1	1	1	0	0
3	1	4	13	2	2	0	0	1	0
3	1	4	14	2	1	1	1	1	1
3	1	4	15	2	2	2	1	0	0
3	1	4	16	2	2	1	2	0	0
3	1	4	17	2	1	1	1	1	1
3	1	4	18	2	2	1	2	1	1
3	1	4	19	2	2	2	1	0	0
3	1	4	20	2	2	1	2	1	1
3	1	4	21	2	2	2	1	1	1
3	1	4	22	2	1	2	2	1	1
3	1	4	23	2	2	2	1	1	1
3	1	4	24	2	1	1	1	0	0
3	1	4	25	2	2	2	1	1	1
3	1	4	26	2	1	1	1	0	0
3	1	4	27	2	1	1	1	1	1
3	1	4	28	2	1	2	2	0	1
3	1	4	29	2	1	1	1	1	1
3	1	4	30	2	2	0	0	0	0
3	1	4	31	2	1	1	1	0	0
3	1	4	32	2	2	2	1	1	1
3	1	5	1	1	2	2	1	0	0
3	1	5	2	1	1	1	1	0	0
3	1	5	3	1	2	2	1	1	1
3	1	5	4	1	1	1	1	0	0
3	1	5	5	1	2	2	1	0	0
3	1	5	6	1	1	0	0	1	0
3	1	5	7	1	1	2	2	0	0
3	1	5	8	1	2	2	1	0	0
3	1	5	9	1	2	2	1	0	0
3	1	5	10	1	2	1	2	0	0
3	1	5	11	1	2	0	0	1	0
3	1	5	12	1	1	1	1	0	0
3	1	5	13	1	1	2	2	0	0
3	1	5	14	1	2	2	1	1	1
3	1	5	15	1	2	1	2	0	0
3	1	5	16	1	2	0	0	0	0
3	1	5	17	1	1	1	1	1	1
3	1	5	18	1	1	2	2	1	1
3	1	5	19	1	1	0	0	0	0
3	1	5	20	1	2	2	1	1	1
3	1	5	21	1	2	1	2	1	1
3	1	5	22	1	1	1	1	0	0
3	1	5	23	1	2	2	1	1	1
3	1	5	24	1	2	2	1	0	0
3	1	5	25	1	2	2	1	1	1
3	1	5	26	1	1	1	1	1	1
3	1	5	27	1	1	1	1	1	1
3	1	5	28	1	1	2	2	1	1
3	1	5	29	1	1	1	1	0	0
3	1	5	30	1	1	1	1	1	1
3	1	5	31	1	2	1	2	1	1
3	1	5	32	1	1	1	1	1	1
3	1	6	1	2	1	1	1	1	0
3	1	6	2	2	2	2	1	0	0
3	1	6	3	2	1	1	1	0	0
3	1	6	4	2	2	0	0	1	0
3	1	6	5	2	2	1	2	1	1
3	1	6	6	2	2	2	1	1	1
3	1	6	7	2	1	1	1	1	1
3	1	6	8	2	1	0	0	0	0
3	1	6	9	2	2	2	1	1	1
3	1	6	10	2	1	2	2	0	0
3	1	6	11	2	2	2	1	0	0
3	1	6	12	2	2	2	1	0	0
3	1	6	13	2	2	1	2	0	0
3	1	6	14	2	1	1	1	1	1
3	1	6	15	2	1	1	1	0	0
3	1	6	16	2	2	0	0	0	0
3	1	6	17	2	1	2	2	1	1
3	1	6	18	2	1	0	0	1	0
3	1	6	19	2	1	2	2	0	0
3	1	6	20	2	2	2	1	0	0
3	1	6	21	2	2	2	1	0	0
3	1	6	22	2	1	1	1	1	1
3	1	6	23	2	2	2	1	1	1
3	1	6	24	2	1	1	1	0	0
3	1	6	25	2	2	1	2	0	0
3	1	6	26	2	1	1	1	1	1
3	1	6	27	2	1	1	1	0	0
3	1	6	28	2	1	2	2	1	1
3	1	6	29	2	2	2	1	1	1
3	1	6	30	2	2	2	1	1	1
3	1	6	31	2	1	1	1	0	1
3	1	6	32	2	2	1	2	1	0
3	1	7	1	1	1	1	1	1	1
3	1	7	2	1	1	1	1	1	1
3	1	7	3	1	2	2	1	1	1
3	1	7	4	1	1	0	0	0	0
3	1	7	5	1	1	0	0	1	0
3	1	7	6	1	2	2	1	0	0
3	1	7	7	1	2	2	1	0	0
3	1	7	8	1	2	1	2	1	1
3	1	7	9	1	1	1	1	0	0
3	1	7	10	1	2	0	0	0	0
3	1	7	11	1	1	2	2	1	1
3	1	7	12	1	2	2	1	1	1
3	1	7	13	1	1	1	1	0	0
3	1	7	14	1	2	2	1	0	0
3	1	7	15	1	1	2	2	1	1
3	1	7	16	1	2	2	1	1	1
3	1	7	17	1	2	2	1	0	0
3	1	7	18	1	2	1	2	0	0
3	1	7	19	1	1	1	1	0	0
3	1	7	20	1	1	1	1	1	1
3	1	7	21	1	2	2	1	1	1
3	1	7	22	1	1	2	2	0	0
3	1	7	23	1	2	2	1	1	1
3	1	7	24	1	2	2	1	0	0
3	1	7	25	1	2	1	2	1	1
3	1	7	26	1	1	1	1	0	0
3	1	7	27	1	1	1	1	0	0
3	1	7	28	1	1	2	2	0	0
3	1	7	29	1	1	1	1	1	1
3	1	7	30	1	1	1	1	1	1
3	1	7	31	1	2	1	2	0	1
3	1	7	32	1	2	0	0	1	0
3	1	8	1	2	1	1	1	1	0
3	1	8	2	2	1	1	1	0	0
3	1	8	3	2	1	1	1	0	0
3	1	8	4	2	2	2	1	1	0
3	1	8	5	2	2	1	2	0	0
3	1	8	6	2	2	2	1	1	1
3	1	8	7	2	2	0	0	0	0
3	1	8	8	2	2	2	1	1	1
3	1	8	9	2	1	2	2	1	1
3	1	8	10	2	1	0	0	0	0
3	1	8	11	2	2	2	1	0	0
3	1	8	12	2	2	2	1	0	0
3	1	8	13	2	2	1	2	0	0
3	1	8	14	2	2	2	1	0	0
3	1	8	15	2	1	1	1	1	1
3	1	8	16	2	1	1	1	0	0
3	1	8	17	2	1	1	1	1	1
3	1	8	18	2	1	2	2	0	1
3	1	8	19	2	1	0	0	1	0
3	1	8	20	2	2	1	2	1	1
3	1	8	21	2	2	0	0	1	0
3	1	8	22	2	2	2	1	1	1
3	1	8	23	2	2	1	2	1	1
3	1	8	24	2	1	1	1	1	1
3	1	8	25	2	1	1	1	0	0
3	1	8	26	2	2	2	1	0	0
3	1	8	27	2	2	2	1	1	1
3	1	8	28	2	1	1	1	0	0
3	1	8	29	2	1	2	2	1	1
3	1	8	30	2	1	1	1	1	0
3	1	8	31	2	1	2	2	0	0
3	1	8	32	2	2	2	1	0	0
4	1	1	1	1	2	2	1	0	0
4	1	1	2	1	2	2	1	1	1
4	1	1	3	1	2	2	1	0	0
4	1	1	4	1	2	1	2	1	0
4	1	1	5	1	2	2	1	0	0
4	1	1	6	1	1	1	1	1	1
4	1	1	7	1	1	2	2	0	1
4	1	1	8	1	1	1	1	1	1
4	1	1	9	1	2	1	2	0	0
4	1	1	10	1	2	2	1	1	1
4	1	1	11	1	2	2	1	1	1
4	1	1	12	1	1	2	2	0	1
4	1	1	13	1	1	1	1	0	0
4	1	1	14	1	2	0	0	1	0
4	1	1	15	1	1	1	1	0	0
4	1	1	16	1	1	2	2	1	1
4	1	1	17	1	2	2	1	1	0
4	1	1	18	1	2	1	2	1	1
4	1	1	19	1	1	1	1	0	0
4	1	1	20	1	2	2	1	1	1
4	1	1	21	1	1	0	0	0	0
4	1	1	22	1	1	2	2	1	1
4	1	1	23	1	1	0	0	1	0
4	1	1	24	1	1	1	1	1	1
4	1	1	25	1	2	0	0	0	0
4	1	1	26	1	1	1	1	0	0
4	1	1	27	1	1	1	1	1	1
4	1	1	28	1	2	2	1	0	0
4	1	1	29	1	2	2	1	0	0
4	1	1	30	1	2	1	2	0	0
4	1	1	31	1	1	1	1	0	0
4	1	1	32	1	1	1	1	1	1
4	1	2	1	2	1	1	1	0	0
4	1	2	2	2	2	2	1	1	0
4	1	2	3	2	2	2	1	1	0
4	1	2	4	2	2	2	1	1	1
4	1	2	5	2	1	1	1	0	0
4	1	2	6	2	2	0	0	0	0
4	1	2	7	2	2	1	2	1	1
4	1	2	8	2	2	2	1	0	0
4	1	2	9	2	2	1	2	1	1
4	1	2	10	2	2	2	1	0	0
4	1	2	11	2	1	2	2	1	0
4	1	2	12	2	1	1	1	0	0
4	1	2	13	2	1	2	2	0	0
4	1	2	14	2	2	2	1	1	1
4	1	2	15	2	2	2	1	1	1
4	1	2	16	2	1	1	1	0	0
4	1	2	17	2	1	1	1	1	1
4	1	2	18	2	1	1	1	1	1
4	1	2	19	2	2	1	2	0	0
4	1	2	20	2	1	1	1	1	1
4	1	2	21	2	2	1	2	0	0
4	1	2	22	2	2	2	1	0	0
4	1	2	23	2	1	0	0	1	0
4	1	2	24	2	1	2	2	0	0
4	1	2	25	2	1	1	1	1	1
4	1	2	26	2	1	0	0	0	0
4	1	2	27	2	1	1	1	0	0
4	1	2	28	2	2	2	1	0	0
4	1	2	29	2	1	1	1	1	1
4	1	2	30	2	2	2	1	0	0
4	1	2	31	2	1	2	2	1	1
4	1	2	32	2	2	0	0	1	0
4	1	3	1	1	1	1	1	1	0
4	1	3	2	1	2	2	1	0	0
4	1	3	3	1	1	1	1	0	0
4	1	3	4	1	2	2	1	1	0
4	1	3	5	1	2	2	1	0	0
4	1	3	6	1	1	1	1	1	0
4	1	3	7	1	2	0	0	1	0
4	1	3	8	1	1	2	2	1	0
4	1	3	9	1	1	1	1	0	0
4	1	3	10	1	2	2	1	1	0
4	1	3	11	1	2	1	2	0	0
4	1	3	12	1	1	0	0	0	0
4	1	3	13	1	1	1	1	1	0
4	1	3	14	1	2	1	2	1	0
4	1	3	15	1	2	2	1	0	0
4	1	3	16	1	2	2	1	1	0
4	1	3	17	1	1	1	1	0	0
4	1	3	18	1	2	2	1	0	0
4	1	3	19	1	1	1	1	0	0
4	1	3	20	1	1	1	1	1	0
4	1	3	21	1	2	2	1	0	0
4	1	3	22	1	2	1	2	0	0
4	1	3	23	1	2	2	1	1	0
4	1	3	24	1	2	1	2	1	0
4	1	3	25	1	1	0	0	1	0
4	1	3	26	1	1	1	1	0	0
4	1	3	27	1	1	2	2	0	0
4	1	3	28	1	2	0	0	0	0
4	1	3	29	1	1	2	2	0	0
4	1	3	30	1	2	2	1	1	0
4	1	3	31	1	1	2	2	1	0
4	1	3	32	1	1	1	1	1	0
4	1	4	1	2	1	1	1	0	0
4	1	4	2	2	1	1	1	1	1
4	1	4	3	2	1	1	1	1	1
4	1	4	4	2	1	1	1	1	1
4	1	4	5	2	2	2	1	0	0
4	1	4	6	2	1	1	1	0	0
4	1	4	7	2	1	1	1	0	0
4	1	4	8	2	1	2	2	0	0
4	1	4	9	2	1	1	1	1	1
4	1	4	10	2	2	2	1	1	1
4	1	4	11	2	2	1	2	0	0
4	1	4	12	2	2	2	1	1	1
4	1	4	13	2	1	2	2	0	0
4	1	4	14	2	2	2	1	0	0
4	1	4	15	2	2	0	0	1	0
4	1	4	16	2	2	2	1	0	0
4	1	4	17	2	1	2	2	1	0
4	1	4	18	2	1	0	0	1	0
4	1	4	19	2	2	2	1	1	0
4	1	4	20	2	2	1	2	1	0
4	1	4	21	2	1	1	1	0	0
4	1	4	22	2	2	2	1	1	1
4	1	4	23	2	2	1	2	1	1
4	1	4	24	2	2	0	0	0	0
4	1	4	25	2	2	2	1	1	1
4	1	4	26	2	1	1	1	1	1
4	1	4	27	2	1	1	1	0	0
4	1	4	28	2	2	2	1	0	0
4	1	4	29	2	1	0	0	0	0
4	1	4	30	2	2	1	2	0	0
4	1	4	31	2	2	2	1	0	0
4	1	4	32	2	1	2	2	1	0
4	1	5	1	1	1	1	1	0	0
4	1	5	2	1	1	1	1	0	0
4	1	5	3	1	2	2	1	1	0
4	1	5	4	1	2	2	1	1	0
4	1	5	5	1	2	2	1	0	0
4	1	5	6	1	1	1	1	1	0
4	1	5	7	1	2	1	2	0	0
4	1	5	8	1	2	2	1	0	0
4	1	5	9	1	1	1	1	0	0
4	1	5	10	1	1	2	2	0	0
4	1	5	11	1	2	2	1	1	0
4	1	5	12	1	1	2	2	1	0
4	1	5	13	1	1	1	1	1	0
4	1	5	14	1	2	0	0	0	0
4	1	5	15	1	1	0	0	0	0
4	1	5	16	1	2	2	1	0	1
4	1	5	17	1	1	1	1	0	1
4	1	5	18	1	1	2	2	0	0
4	1	5	19	1	1	0	0	1	0
4	1	5	20	1	2	2	1	1	0
4	1	5	21	1	2	2	1	0	0
4	1	5	22	1	1	1	1	1	1
4	1	5	23	1	2	2	1	0	0
4	1	5	24	1	2	2	1	1	1
4	1	5	25	1	2	1	2	1	1
4	1	5	26	1	1	1	1	1	1
4	1	5	27	1	2	1	2	1	1
4	1	5	28	1	1	1	1	1	1
4	1	5	29	1	1	1	1	0	0
4	1	5	30	1	1	2	2	1	1
4	1	5	31	1	2	0	0	1	0
4	1	5	32	1	2	1	2	0	0
4	1	6	1	2	1	1	1	0	1
4	1	6	2	2	2	2	1	1	1
4	1	6	3	2	2	2	1	0	0
4	1	6	4	2	1	2	2	1	0
4	1	6	5	2	1	0	0	0	0
4	1	6	6	2	1	1	1	0	0
4	1	6	7	2	1	2	2	0	0
4	1	6	8	2	2	2	1	0	0
4	1	6	9	2	2	1	2	1	1
4	1	6	10	2	1	1	1	0	0
4	1	6	11	2	2	2	1	1	1
4	1	6	12	2	2	2	1	0	0
4	1	6	13	2	1	2	2	1	0
4	1	6	14	2	1	1	1	1	0
4	1	6	15	2	2	2	1	1	0
4	1	6	16	2	1	2	2	0	0
4	1	6	17	2	2	2	1	1	1
4	1	6	18	2	2	2	1	1	1
4	1	6	19	2	2	1	2	0	1
4	1	6	20	2	1	1	1	1	1
4	1	6	21	2	2	0	0	1	0
4	1	6	22	2	1	1	1	1	1
4	1	6	23	2	2	1	2	1	0
4	1	6	24	2	2	2	1	0	0
4	1	6	25	2	1	1	1	0	0
4	1	6	26	2	1	1	1	1	0
4	1	6	27	2	2	2	1	0	0
4	1	6	28	2	1	0	0	1	0
4	1	6	29	2	1	1	1	0	0
4	1	6	30	2	1	1	1	1	0
4	1	6	31	2	2	0	0	0	0
4	1	6	32	2	2	1	2	0	1
4	1	7	1	1	2	2	1	1	0
4	1	7	2	1	1	1	1	1	0
4	1	7	3	1	1	1	1	1	1
4	1	7	4	1	2	0	0	0	0
4	1	7	5	1	1	2	2	1	1
4	1	7	6	1	2	2	1	1	1
4	1	7	7	1	1	2	2	1	1
4	1	7	8	1	1	1	1	0	0
4	1	7	9	1	2	2	1	0	0
4	1	7	10	1	2	2	1	1	0
4	1	7	11	1	2	2	1	0	0
4	1	7	12	1	2	2	1	0	0
4	1	7	13	1	2	0	0	1	0
4	1	7	14	1	2	2	1	0	0
4	1	7	15	1	2	1	2	1	0
4	1	7	16	1	1	1	1	0	0
4	1	7	17	1	1	0	0	0	0
4	1	7	18	1	1	1	1	0	0
4	1	7	19	1	1	0	0	1	0
4	1	7	20	1	1	2	2	0	0
4	1	7	21	1	1	1	1	0	0
4	1	7	22	1	2	1	2	0	0
4	1	7	23	1	1	1	1	1	0
4	1	7	24	1	2	2	1	1	0
4	1	7	25	1	2	1	2	1	0
4	1	7	26	1	1	1	1	1	0
4	1	7	27	1	2	2	1	0	0
4	1	7	28	1	1	1	1	1	1
4	1	7	29	1	1	1	1	0	0
4	1	7	30	1	1	2	2	0	0
4	1	7	31	1	2	2	1	1	0
4	1	7	32	1	2	1	2	0	0
4	1	8	1	2	1	1	1	1	1
4	1	8	2	2	2	2	1	1	0
4	1	8	3	2	1	1	1	0	0
4	1	8	4	2	1	2	2	0	0
4	1	8	5	2	1	0	0	0	0
4	1	8	6	2	2	2	1	1	0
4	1	8	7	2	1	1	1	1	0
4	1	8	8	2	1	2	2	0	0
4	1	8	9	2	1	1	1	0	0
4	1	8	10	2	2	2	1	0	0
4	1	8	11	2	2	2	1	1	0
4	1	8	12	2	1	1	1	0	0
4	1	8	13	2	2	1	2	0	0
4	1	8	14	2	2	2	1	0	0
4	1	8	15	2	1	0	0	1	0
4	1	8	16	2	1	1	1	1	0
4	1	8	17	2	2	2	1	1	1
4	1	8	18	2	2	1	2	0	1
4	1	8	19	2	2	0	0	1	0
4	1	8	20	2	2	1	2	1	1
4	1	8	21	2	1	1	1	1	0
4	1	8	22	2	2	0	0	0	0
4	1	8	23	2	1	2	2	1	0
4	1	8	24	2	1	1	1	0	0
4	1	8	25	2	2	2	1	0	0
4	1	8	26	2	2	1	2	1	1
4	1	8	27	2	2	2	1	1	1
4	1	8	28	2	1	1	1	0	0
4	1	8	29	2	2	2	1	0	0
4	1	8	30	2	1	1	1	1	1
4	1	8	31	2	1	2	2	1	1
4	1	8	32	2	2	2	1	0	0
5	1	1	1	1	1	1	1	1	1
5	1	1	2	1	1	1	1	0	0
5	1	1	3	1	2	2	1	0	0
5	1	1	4	1	1	1	1	0	0
5	1	1	5	1	1	0	0	0	0
5	1	1	6	1	1	1	1	0	0
5	1	1	7	1	1	1	1	1	1
5	1	1	8	1	2	2	1	0	0
5	1	1	9	1	1	2	2	1	1
5	1	1	10	1	1	1	1	1	1
5	1	1	11	1	1	1	1	1	1
5	1	1	12	1	2	1	2	0	0
5	1	1	13	1	2	2	1	1	1
5	1	1	14	1	2	1	2	0	0
5	1	1	15	1	2	2	1	0	1
5	1	1	16	1	1	2	2	1	1
5	1	1	17	1	2	2	1	1	1
5	1	1	18	1	1	2	2	0	0
5	1	1	19	1	2	2	1	1	1
5	1	1	20	1	2	2	1	0	0
5	1	1	21	1	1	2	2	0	0
5	1	1	22	1	2	0	0	1	0
5	1	1	23	1	1	1	1	0	0
5	1	1	24	1	2	2	1	0	0
5	1	1	25	1	1	1	1	0	0
5	1	1	26	1	2	2	1	1	1
5	1	1	27	1	2	1	2	1	1
5	1	1	28	1	1	0	0	1	0
5	1	1	29	1	2	0	0	0	0
5	1	1	30	1	2	2	1	1	1
5	1	1	31	1	2	1	2	1	1
5	1	1	32	1	1	1	1	1	1
5	1	2	1	2	2	2	1	1	1
5	1	2	2	2	1	1	1	0	0
5	1	2	3	2	1	1	1	1	1
5	1	2	4	2	2	0	0	0	0
5	1	2	5	2	1	1	1	0	0
5	1	2	6	2	1	2	2	0	0
5	1	2	7	2	2	2	1	0	0
5	1	2	8	2	2	2	1	0	0
5	1	2	9	2	2	0	0	1	0
5	1	2	10	2	2	2	1	0	0
5	1	2	11	2	2	1	2	1	1
5	1	2	12	2	2	2	1	1	1
5	1	2	13	2	1	0	0	0	0
5	1	2	14	2	1	2	2	1	1
5	1	2	15	2	1	1	1	1	1
5	1	2	16	2	2	2	1	1	1
5	1	2	17	2	1	2	2	0	0
5	1	2	18	2	2	2	1	1	1
5	1	2	19	2	1	1	1	1	1
5	1	2	20	2	1	2	2	1	1
5	1	2	21	2	2	2	1	0	0
5	1	2	22	2	2	1	2	1	1
5	1	2	23	2	1	1	1	0	0
5	1	2	24	2	1	1	1	1	1
5	1	2	25	2	1	1	1	0	0
5	1	2	26	2	1	0	0	1	0
5	1	2	27	2	2	1	2	0	0
5	1	2	28	2	2	2	1	1	1
5	1	2	29	2	2	2	1	0	0
5	1	2	30	2	1	1	1	1	1
5	1	2	31	2	2	1	2	0	0
5	1	2	32	2	1	1	1	0	0
5	1	3	1	1	2	2	1	1	1
5	1	3	2	1	2	2	1	1	1
5	1	3	3	1	2	2	1	0	0
5	1	3	4	1	2	2	1	1	1
5	1	3	5	1	1	1	1	1	1
5	1	3	6	1	2	1	2	0	0
5	1	3	7	1	2	2	1	1	1
5	1	3	8	1	2	1	2	1	1
5	1	3	9	1	1	1	1	0	0
5	1	3	10	1	1	1	1	0	0
5	1	3	11	1	1	2	2	1	1
5	1	3	12	1	1	1	1	1	1
5	1	3	13	1	1	1	1	0	0
5	1	3	14	1	2	0	0	0	0
5	1	3	15	1	1	1	1	0	0
5	1	3	16	1	1	0	0	0	0
5	1	3	17	1	2	1	2	1	1
5	1	3	18	1	2	2	1	0	0
5	1	3	19	1	1	2	2	0	0
5	1	3	20	1	2	2	1	0	0
5	1	3	21	1	2	0	0	1	0
5	1	3	22	1	1	1	1	1	1
5	1	3	23	1	2	2	1	1	1
5	1	3	24	1	2	2	1	0	0
5	1	3	25	1	2	2	1	0	0
5	1	3	26	1	2	1	2	0	0
5	1	3	27	1	1	0	0	1	0
5	1	3	28	1	1	2	2	1	1
5	1	3	29	1	1	1	1	0	0
5	1	3	30	1	1	1	1	1	0
5	1	3	31	1	1	1	1	1	1
5	1	3	32	1	1	2	2	0	0
5	1	4	1	2	2	2	1	0	0
5	1	4	2	2	2	2	1	1	1
5	1	4	3	2	2	2	1	1	1
5	1	4	4	2	2	2	1	0	1
5	1	4	5	2	2	1	2	1	1
5	1	4	6	2	1	1	1	1	0
5	1	4	7	2	1	1	1	1	1
5	1	4	8	2	2	1	2	0	0
5	1	4	9	2	1	1	1	0	0
5	1	4	10	2	1	0	0	0	0
5	1	4	11	2	2	1	2	1	1
5	1	4	12	2	1	1	1	0	1
5	1	4	13	2	2	0	0	0	0
5	1	4	14	2	2	2	1	0	0
5	1	4	15	2	2	0	0	1	0
5	1	4	16	2	2	2	1	1	1
5	1	4	17	2	2	2	1	0	1
5	1	4	18	2	1	2	2	0	0
5	1	4	19	2	1	1	1	1	1
5	1	4	20	2	1	1	1	0	1
5	1	4	21	2	2	1	2	0	0
5	1	4	22	2	2	2	1	1	0
5	1	4	23	2	1	1	1	0	0
5	1	4	24	2	1	2	2	0	0
5	1	4	25	2	1	1	1	1	1
5	1	4	26	2	1	1	1	0	0
5	1	4	27	2	2	2	1	1	1
5	1	4	28	2	1	2	2	1	1
5	1	4	29	2	1	1	1	1	0
5	1	4	30	2	2	2	1	0	0
5	1	4	31	2	1	2	2	1	1
5	1	4	32	2	1	0	0	1	0
5	1	5	1	1	1	1	1	1	1
5	1	5	2	1	1	1	1	0	0
5	1	5	3	1	1	1	1	0	0
5	1	5	4	1	2	1	2	1	1
5	1	5	5	1	2	2	1	1	1
5	1	5	6	1	1	2	2	0	0
5	1	5	7	1	2	2	1	1	1
5	1	5	8	1	2	1	2	0	0
5	1	5	9	1	2	2	1	0	0
5	1	5	10	1	2	1	2	0	0
5	1	5	11	1	1	1	1	1	1
5	1	5	12	1	1	1	1	1	1
5	1	5	13	1	1	1	1	0	0
5	1	5	14	1	2	2	1	1	1
5	1	5	15	1	1	2	2	1	1
5	1	5	16	1	2	2	1	1	1
5	1	5	17	1	1	1	1	0	0
5	1	5	18	1	1	0	0	0	0
5	1	5	19	1	2	0	0	1	0
5	1	5	20	1	1	1	1	1	1
5	1	5	21	1	2	2	1	0	0
5	1	5	22	1	2	1	2	1	1
5	1	5	23	1	2	2	1	1	1
5	1	5	24	1	1	2	2	0	0
5	1	5	25	1	2	2	1	0	0
5	1	5	26	1	2	2	1	0	0
5	1	5	27	1	1	1	1	1	1
5	1	5	28	1	1	2	2	1	1
5	1	5	29	1	2	2	1	0	0
5	1	5	30	1	1	1	1	0	0
5	1	5	31	1	2	0	0	0	0
5	1	5	32	1	1	0	0	1	0
5	1	6	1	2	2	2	1	0	0
5	1	6	2	2	1	1	1	1	1
5	1	6	3	2	2	2	1	1	1
5	1	6	4	2	1	2	2	1	1
5	1	6	5	2	1	1	1	0	0
5	1	6	6	2	1	1	1	0	0
5	1	6	7	2	2	1	2	1	1
5	1	6	8	2	1	1	1	0	0
5	1	6	9	2	1	1	1	0	0
5	1	6	10	2	1	0	0	0	0
5	1	6	11	2	1	2	2	0	1
5	1	6	12	2	1	1	1	0	1
5	1	6	13	2	2	1	2	0	0
5	1	6	14	2	1	1	1	1	1
5	1	6	15	2	1	2	2	0	1
5	1	6	16	2	1	0	0	1	0
5	1	6	17	2	2	2	1	0	0
5	1	6	18	2	1	1	1	1	0
5	1	6	19	2	2	2	1	0	0
5	1	6	20	2	1	1	1	1	1
5	1	6	21	2	2	2	1	1	1
5	1	6	22	2	2	2	1	1	1
5	1	6	23	2	2	2	1	1	1
5	1	6	24	2	2	2	1	0	1
5	1	6	25	2	1	2	2	1	1
5	1	6	26	2	1	1	1	1	1
5	1	6	27	2	2	0	0	1	0
5	1	6	28	2	2	1	2	1	1
5	1	6	29	2	2	0	0	0	0
5	1	6	30	2	2	2	1	0	0
5	1	6	31	2	2	1	2	0	0
5	1	6	32	2	2	2	1	1	0
5	1	7	1	1	2	2	1	1	1
5	1	7	2	1	2	2	1	1	1
5	1	7	3	1	1	1	1	0	0
5	1	7	4	1	1	1	1	1	1
5	1	7	5	1	1	1	1	1	1
5	1	7	6	1	1	1	1	1	1
5	1	7	7	1	1	2	2	0	0
5	1	7	8	1	2	2	1	0	1
5	1	7	9	1	2	2	1	1	1
5	1	7	10	1	1	2	2	1	1
5	1	7	11	1	2	2	1	0	1
5	1	7	12	1	2	2	1	0	0
5	1	7	13	1	1	1	1	0	0
5	1	7	14	1	2	1	2	0	1
5	1	7	15	1	1	0	0	1	0
5	1	7	16	1	2	1	2	0	0
5	1	7	17	1	2	2	1	0	0
5	1	7	18	1	1	1	1	0	0
5	1	7	19	1	2	0	0	1	0
5	1	7	20	1	1	1	1	1	1
5	1	7	21	1	2	2	1	1	1
5	1	7	22	1	1	1	1	0	0
5	1	7	23	1	2	1	2	1	1
5	1	7	24	1	2	2	1	1	1
5	1	7	25	1	2	2	1	0	0
5	1	7	26	1	1	1	1	0	0
5	1	7	27	1	1	2	2	1	0
5	1	7	28	1	1	0	0	0	0
5	1	7	29	1	1	2	2	0	0
5	1	7	30	1	2	0	0	0	0
5	1	7	31	1	1	1	1	1	1
5	1	7	32	1	2	1	2	1	1
5	1	8	1	2	2	2	1	0	0
5	1	8	2	2	1	1	1	0	1
5	1	8	3	2	2	2	1	1	1
5	1	8	4	2	1	2	2	0	0
5	1	8	5	2	1	1	1	1	1
5	1	8	6	2	2	2	1	0	1
5	1	8	7	2	2	1	2	1	1
5	1	8	8	2	2	2	1	1	0
5	1	8	9	2	1	2	2	1	1
5	1	8	10	2	1	1	1	1	1
5	1	8	11	2	1	1	1	0	0
5	1	8	12	2	2	2	1	0	1
5	1	8	13	2	2	2	1	0	1
5	1	8	14	2	2	2	1	0	0
5	1	8	15	2	2	1	2	0	0
5	1	8	16	2	1	1	1	0	0
5	1	8	17	2	1	2	2	1	0
5	1	8	18	2	1	1	1	0	0
5	1	8	19	2	1	0	0	0	0
5	1	8	20	2	1	1	1	1	1
5	1	8	21	2	1	1	1	1	1
5	1	8	22	2	2	1	2	1	1
5	1	8	23	2	2	2	1	1	1
5	1	8	24	2	1	0	0	1	0
5	1	8	25	2	2	0	0	1	0
5	1	8	26	2	2	1	2	0	0
5	1	8	27	2	2	2	1	1	1
5	1	8	28	2	2	2	1	1	1
5	1	8	29	2	1	1	1	0	0
5	1	8	30	2	1	1	1	1	1
5	1	8	31	2	2	0	0	0	0
5	1	8	32	2	1	2	2	0	0
6	1	1	1	1	2	2	1	1	1
6	1	1	2	1	1	1	1	1	1
6	1	1	3	1	1	1	1	0	0
6	1	1	4	1	2	0	0	1	0
6	1	1	5	1	1	2	2	0	1
6	1	1	6	1	1	1	1	1	0
6	1	1	7	1	1	1	1	1	1
6	1	1	8	1	2	1	2	0	0
6	1	1	9	1	1	1	1	0	0
6	1	1	10	1	1	2	2	0	0
6	1	1	11	1	1	1	1	1	1
6	1	1	12	1	2	2	1	0	0
6	1	1	13	1	2	2	1	0	0
6	1	1	14	1	2	2	1	1	1
6	1	1	15	1	2	2	1	1	1
6	1	1	16	1	2	0	0	0	0
6	1	1	17	1	2	2	1	0	0
6	1	1	18	1	1	2	2	1	1
6	1	1	19	1	1	1	1	0	0
6	1	1	20	1	1	1	1	0	0
6	1	1	21	1	2	1	2	1	1
6	1	1	22	1	2	2	1	0	0
6	1	1	23	1	1	2	2	1	1
6	1	1	24	1	1	1	1	1	0
6	1	1	25	1	1	0	0	0	0
6	1	1	26	1	1	1	1	0	0
6	1	1	27	1	2	2	1	1	1
6	1	1	28	1	2	2	1	1	1
6	1	1	29	1	2	1	2	1	0
6	1	1	30	1	1	0	0	1	0
6	1	1	31	1	2	2	1	0	0
6	1	1	32	1	2	1	2	0	0
6	1	2	1	2	2	2	1	0	0
6	1	2	2	2	2	2	1	0	0
6	1	2	3	2	1	1	1	1	1
6	1	2	4	2	2	2	1	1	1
6	1	2	5	2	1	1	1	1	1
6	1	2	6	2	1	1	1	0	0
6	1	2	7	2	2	1	2	0	0
6	1	2	8	2	2	2	1	1	1
6	1	2	9	2	1	1	1	1	0
6	1	2	10	2	1	2	2	0	0
6	1	2	11	2	2	2	1	0	0
6	1	2	12	2	2	0	0	0	0
6	1	2	13	2	2	2	1	0	0
6	1	2	14	2	1	1	1	1	1
6	1	2	15	2	1	1	1	1	0
6	1	2	16	2	1	2	2	1	1
6	1	2	17	2	2	2	1	1	1
6	1	2	18	2	2	1	2	1	1
6	1	2	19	2	1	1	1	0	0
6	1	2	20	2	2	2	1	0	0
6	1	2	21	2	2	0	0	1	0
6	1	2	22	2	1	2	2	0	0
6	1	2	23	2	1	1	1	0	0
6	1	2	24	2	2	1	2	0	0
6	1	2	25	2	1	0	0	0	0
6	1	2	26	2	2	1	2	1	1
6	1	2	27	2	2	2	1	1	1
6	1	2	28	2	1	1	1	0	0
6	1	2	29	2	1	2	2	1	1
6	1	2	30	2	1	1	1	0	0
6	1	2	31	2	2	2	1	1	1
6	1	2	32	2	1	0	0	1	0
6	1	3	1	1	2	2	1	0	0
6	1	3	2	1	2	2	1	1	1
6	1	3	3	1	1	1	1	1	1
6	1	3	4	1	1	2	2	0	0
6	1	3	5	1	2	0	0	1	0
6	1	3	6	1	1	2	2	1	1
6	1	3	7	1	1	1	1	1	1
6	1	3	8	1	1	0	0	1	0
6	1	3	9	1	2	1	2	1	0
6	1	3	10	1	1	1	1	0	0
6	1	3	11	1	1	0	0	0	0
6	1	3	12	1	2	2	1	0	0
6	1	3	13	1	2	2	1	1	1
6	1	3	14	1	1	1	1	0	0
6	1	3	15	1	2	1	2	0	0
6	1	3	16	1	1	1	1	0	0
6	1	3	17	1	2	1	2	1	1
6	1	3	18	1	2	2	1	0	0
6	1	3	19	1	2	2	1	0	0
6	1	3	20	1	1	2	2	0	0
6	1	3	21	1	1	1	1	0	0
6	1	3	22	1	2	2	1	0	0
6	1	3	23	1	2	2	1	1	1
6	1	3	24	1	1	1	1	1	1
6	1	3	25	1	2	0	0	0	0
6	1	3	26	1	2	1	2	0	0
6	1	3	27	1	1	1	1	0	0
6	1	3	28	1	2	2	1	1	1
6	1	3	29	1	1	1	1	1	1
6	1	3	30	1	1	2	2	1	0
6	1	3	31	1	1	1	1	1	1
6	1	3	32	1	2	2	1	1	1
6	1	4	1	2	2	2	1	0	0
6	1	4	2	2	1	1	1	1	1
6	1	4	3	2	2	2	1	0	0
6	1	4	4	2	2	2	1	1	1
6	1	4	5	2	2	0	0	0	0
6	1	4	6	2	1	1	1	1	1
6	1	4	7	2	1	1	1	1	1
6	1	4	8	2	1	1	1	0	0
6	1	4	9	2	2	1	2	1	0
6	1	4	10	2	2	2	1	0	0
6	1	4	11	2	2	2	1	1	1
6	1	4	12	2	1	2	2	1	1
6	1	4	13	2	1	1	1	0	0
6	1	4	14	2	2	2	1	1	1
6	1	4	15	2	2	1	2	0	0
6	1	4	16	2	2	0	0	1	0
6	1	4	17	2	1	2	2	0	0
6	1	4	18	2	1	0	0	1	0
6	1	4	19	2	2	1	2	1	1
6	1	4	20	2	2	2	1	1	1
6	1	4	21	2	2	2	1	0	0
6	1	4	22	2	1	1	1	0	0
6	1	4	23	2	1	0	0	0	0
6	1	4	24	2	2	2	1	1	1
6	1	4	25	2	1	1	1	0	0
6	1	4	26	2	1	2	2	0	0
6	1	4	27	2	1	1	1	1	1
6	1	4	28	2	1	2	2	1	1
6	1	4	29	2	1	1	1	0	0
6	1	4	30	2	2	2	1	0	0
6	1	4	31	2	1	1	1	1	1
6	1	4	32	2	2	1	2	0	0
6	1	5	1	1	1	1	1	0	0
6	1	5	2	1	2	2	1	0	0
6	1	5	3	1	1	1	1	1	1
6	1	5	4	1	2	1	2	1	1
6	1	5	5	1	1	0	0	0	0
6	1	5	6	1	1	2	2	0	0
6	1	5	7	1	1	1	1	1	1
6	1	5	8	1	1	1	1	0	0
6	1	5	9	1	2	2	1	1	1
6	1	5	10	1	1	2	2	0	0
6	1	5	11	1	1	1	1	0	0
6	1	5	12	1	1	1	1	1	1
6	1	5	13	1	2	0	0	1	0
6	1	5	14	1	2	1	2	1	1
6	1	5	15	1	2	2	1	1	1
6	1	5	16	1	1	1	1	1	1
6	1	5	17	1	1	1	1	1	1
6	1	5	18	1	2	2	1	1	0
6	1	5	19	1	2	2	1	0	0
6	1	5	20	1	2	1	2	0	0
6	1	5	21	1	1	0	0	1	0
6	1	5	22	1	1	2	2	1	1
6	1	5	23	1	2	2	1	1	0
6	1	5	24	1	2	2	1	0	0
6	1	5	25	1	1	1	1	0	1
6	1	5	26	1	1	1	1	0	0
6	1	5	27	1	2	2	1	0	0
6	1	5	28	1	2	2	1	1	1
6	1	5	29	1	1	2	2	1	1
6	1	5	30	1	2	2	1	0	0
6	1	5	31	1	2	0	0	0	0
6	1	5	32	1	2	1	2	0	0
6	1	6	1	2	2	2	1	1	0
6	1	6	2	2	1	1	1	0	0
6	1	6	3	2	2	2	1	1	1
6	1	6	4	2	1	2	2	1	1
6	1	6	5	2	1	1	1	1	1
6	1	6	6	2	1	1	1	1	1
6	1	6	7	2	2	1	2	1	1
6	1	6	8	2	2	2	1	1	0
6	1	6	9	2	1	2	2	1	1
6	1	6	10	2	1	1	1	1	1
6	1	6	11	2	1	0	0	1	0
6	1	6	12	2	2	2	1	1	0
6	1	6	13	2	2	1	2	0	0
6	1	6	14	2	2	0	0	0	0
6	1	6	15	2	1	1	1	1	1
6	1	6	16	2	2	0	0	1	0
6	1	6	17	2	2	2	1	0	0
6	1	6	18	2	1	2	2	0	0
6	1	6	19	2	1	1	1	0	0
6	1	6	20	2	2	2	1	0	0
6	1	6	21	2	1	2	2	0	0
6	1	6	22	2	1	1	1	1	1
6	1	6	23	2	2	2	1	0	0
6	1	6	24	2	2	1	2	0	0
6	1	6	25	2	2	2	1	0	0
6	1	6	26	2	1	1	1	0	0
6	1	6	27	2	2	2	1	1	1
6	1	6	28	2	1	1	1	0	0
6	1	6	29	2	1	0	0	0	0
6	1	6	30	2	1	1	1	0	0
6	1	6	31	2	2	2	1	0	0
6	1	6	32	2	2	1	2	1	1
6	1	7	1	1	1	1	1	1	1
6	1	7	2	1	2	2	1	1	1
6	1	7	3	1	2	2	1	0	0
6	1	7	4	1	1	1	1	0	0
6	1	7	5	1	2	1	2	1	1
6	1	7	6	1	1	1	1	0	0
6	1	7	7	1	1	2	2	1	1
6	1	7	8	1	1	0	0	0	0
6	1	7	9	1	2	0	0	1	0
6	1	7	10	1	1	2	2	0	0
6	1	7	11	1	1	0	0	1	0
6	1	7	12	1	2	2	1	0	0
6	1	7	13	1	2	1	2	1	1
6	1	7	14	1	2	2	1	1	1
6	1	7	15	1	1	1	1	1	1
6	1	7	16	1	2	1	2	0	0
6	1	7	17	1	2	2	1	0	0
6	1	7	18	1	1	1	1	0	0
6	1	7	19	1	2	2	1	1	1
6	1	7	20	1	2	2	1	0	0
6	1	7	21	1	2	2	1	1	0
6	1	7	22	1	2	2	1	1	1
6	1	7	23	1	2	2	1	0	0
6	1	7	24	1	1	2	2	0	0
6	1	7	25	1	1	1	1	0	0
6	1	7	26	1	1	1	1	1	1
6	1	7	27	1	1	2	2	1	1
6	1	7	28	1	1	1	1	1	1
6	1	7	29	1	2	1	2	0	0
6	1	7	30	1	1	1	1	0	0
6	1	7	31	1	2	0	0	0	0
6	1	7	32	1	1	1	1	1	1
6	1	8	1	2	1	1	1	1	1
6	1	8	2	2	2	2	1	0	0
6	1	8	3	2	2	2	1	1	1
6	1	8	4	2	2	2	1	1	1
6	1	8	5	2	2	2	1	0	0
6	1	8	6	2	2	1	2	0	0
6	1	8	7	2	1	1	1	1	1
6	1	8	8	2	1	1	1	1	0
6	1	8	9	2	1	1	1	1	1
6	1	8	10	2	2	1	2	0	0
6	1	8	11	2	2	0	0	0	0
6	1	8	12	2	1	2	2	1	1
6	1	8	13	2	2	0	0	1	0
6	1	8	14	2	2	2	1	1	1
6	1	8	15	2	1	2	2	0	0
6	1	8	16	2	1	1	1	0	0
6	1	8	17	2	1	0	0	0	0
6	1	8	18	2	2	1	2	1	0
6	1	8	19	2	1	1	1	0	0
6	1	8	20	2	2	2	1	0	0
6	1	8	21	2	1	1	1	0	0
6	1	8	22	2	1	2	2	1	1
6	1	8	23	2	2	2	1	1	1
6	1	8	24	2	1	1	1	1	1
6	1	8	25	2	2	1	2	1	1
6	1	8	26	2	1	1	1	0	0
6	1	8	27	2	1	1	1	0	0
6	1	8	28	2	2	2	1	1	1
6	1	8	29	2	1	0	0	1	0
6	1	8	30	2	2	2	1	0	0
6	1	8	31	2	2	2	1	0	0
6	1	8	32	2	1	2	2	0	0
7	1	1	1	1	2	2	1	0	0
7	1	1	2	1	2	2	1	0	0
7	1	1	3	1	1	1	1	1	1
7	1	1	4	1	2	2	1	0	0
7	1	1	5	1	1	1	1	1	1
7	1	1	6	1	1	2	2	0	0
7	1	1	7	1	1	1	1	1	0
7	1	1	8	1	2	1	2	0	0
7	1	1	9	1	1	1	1	0	0
7	1	1	10	1	1	1	1	1	1
7	1	1	11	1	2	2	1	0	0
7	1	1	12	1	1	2	2	1	1
7	1	1	13	1	1	1	1	0	1
7	1	1	14	1	1	1	1	0	1
7	1	1	15	1	2	1	2	0	1
7	1	1	16	1	2	2	1	1	1
7	1	1	17	1	2	2	1	1	1
7	1	1	18	1	2	2	1	0	0
7	1	1	19	1	1	1	1	1	1
7	1	1	20	1	1	1	1	0	0
7	1	1	21	1	2	0	0	0	0
7	1	1	22	1	2	1	2	1	1
7	1	1	23	1	1	0	0	1	0
7	1	1	24	1	2	0	0	1	0
7	1	1	25	1	2	2	1	1	0
7	1	1	26	1	2	1	2	1	1
7	1	1	27	1	1	1	1	0	0
7	1	1	28	1	1	2	2	1	1
7	1	1	29	1	2	2	1	1	1
7	1	1	30	1	1	2	2	0	0
7	1	1	31	1	2	2	1	1	0
7	1	1	32	1	1	0	0	0	0
7	1	2	1	2	1	1	1	1	1
7	1	2	2	2	2	2	1	0	0
7	1	2	3	2	2	2	1	1	1
7	1	2	4	2	2	2	1	1	1
7	1	2	5	2	2	0	0	0	0
7	1	2	6	2	1	1	1	1	1
7	1	2	7	2	1	2	2	0	0
7	1	2	8	2	2	2	1	1	1
7	1	2	9	2	1	0	0	0	0
7	1	2	10	2	1	2	2	0	0
7	1	2	11	2	1	1	1	1	1
7	1	2	12	2	2	1	2	1	1
7	1	2	13	2	2	2	1	0	0
7	1	2	14	2	2	1	2	0	0
7	1	2	15	2	2	2	1	0	0
7	1	2	16	2	1	1	1	1	1
7	1	2	17	2	2	2	1	1	1
7	1	2	18	2	1	2	2	1	1
7	1	2	19	2	1	1	1	0	0
7	1	2	20	2	2	2	1	0	0
7	1	2	21	2	1	1	1	0	0
7	1	2	22	2	1	1	1	1	1
7	1	2	23	2	2	1	2	0	0
7	1	2	24	2	1	0	0	1	0
7	1	2	25	2	2	0	0	1	0
7	1	2	26	2	2	2	1	1	0
7	1	2	27	2	1	1	1	0	0
7	1	2	28	2	1	1	1	0	0
7	1	2	29	2	2	1	2	1	1
7	1	2	30	2	2	2	1	0	0
7	1	2	31	2	1	1	1	0	0
7	1	2	32	2	1	2	2	1	0
7	1	3	1	1	1	1	1	1	1
7	1	3	2	1	2	2	1	1	1
7	1	3	3	1	2	2	1	1	1
7	1	3	4	1	1	1	1	0	0
7	1	3	5	1	2	1	2	0	0
7	1	3	6	1	2	2	1	0	0
7	1	3	7	1	1	2	2	0	0
7	1	3	8	1	1	1	1	0	0
7	1	3	9	1	2	2	1	1	1
7	1	3	10	1	1	2	2	1	1
7	1	3	11	1	1	1	1	1	1
7	1	3	12	1	2	0	0	1	0
7	1	3	13	1	2	2	1	0	0
7	1	3	14	1	2	2	1	0	0
7	1	3	15	1	2	2	1	0	0
7	1	3	16	1	2	1	2	1	0
7	1	3	17	1	2	2	1	1	1
7	1	3	18	1	2	1	2	1	1
7	1	3	19	1	2	2	1	0	0
7	1	3	20	1	1	1	1	0	0
7	1	3	21	1	1	1	1	1	1
7	1	3	22	1	2	1	2	0	0
7	1	3	23	1	1	1	1	1	1
7	1	3	24	1	1	1	1	0	0
7	1	3	25	1	1	0	0	1	0
7	1	3	26	1	1	2	2	1	1
7	1	3	27	1	1	1	1	0	1
7	1	3	28	1	2	2	1	1	1
7	1	3	29	1	1	1	1	1	1
7	1	3	30	1	1	0	0	0	0
7	1	3	31	1	2	0	0	0	0
7	1	3	32	1	1	2	2	0	0
7	1	4	1	2	1	1	1	0	0
7	1	4	2	2	2	2	1	1	1
7	1	4	3	2	2	2	1	0	0
7	1	4	4	2	1	1	1	0	0
7	1	4	5	2	2	2	1	0	0
7	1	4	6	2	1	1	1	1	1
7	1	4	7	2	1	1	1	1	1
7	1	4	8	2	2	1	2	1	1
7	1	4	9	2	1	1	1	0	1
7	1	4	10	2	1	1	1	1	1
7	1	4	11	2	1	2	2	0	0
7	1	4	12	2	2	2	1	0	0
7	1	4	13	2	2	2	1	1	1
7	1	4	14	2	2	2	1	0	0
7	1	4	15	2	1	0	0	1	0
7	1	4	16	2	1	2	2	0	0
7	1	4	17	2	2	2	1	1	0
7	1	4	18	2	1	1	1	1	1
7	1	4	19	2	2	1	2	0	0
7	1	4	20	2	2	2	1	1	1
7	1	4	21	2	2	2	1	1	1
7	1	4	22	2	1	2	2	1	1
7	1	4	23	2	2	2	1	0	0
7	1	4	24	2	2	1	2	0	0
7	1	4	25	2	2	0	0	0	0
7	1	4	26	2	1	0	0	0	0
7	1	4	27	2	2	1	2	1	1
7	1	4	28	2	1	1	1	1	1
7	1	4	29	2	2	0	0	1	0
7	1	4	30	2	1	1	1	0	1
7	1	4	31	2	1	1	1	0	0
7	1	4	32	2	1	2	2	1	1
7	1	5	1	1	1	1	1	1	1
7	1	5	2	1	2	2	1	1	1
7	1	5	3	1	2	2	1	0	0
7	1	5	4	1	1	2	2	1	1
7	1	5	5	1	1	1	1	0	0
7	1	5	6	1	1	1	1	0	0
7	1	5	7	1	1	1	1	1	0
7	1	5	8	1	2	1	2	1	1
7	1	5	9	1	1	1	1	0	1
7	1	5	10	1	2	1	2	1	0
7	1	5	11	1	2	2	1	0	0
7	1	5	12	1	1	0	0	1	0
7	1	5	13	1	2	2	1	1	0
7	1	5	14	1	1	2	2	1	1
7	1	5	15	1	2	0	0	1	0
7	1	5	16	1	1	1	1	1	1
7	1	5	17	1	2	1	2	0	1
7	1	5	18	1	1	1	1	1	1
7	1	5	19	1	1	1	1	1	1
7	1	5	20	1	1	2	2	0	0
7	1	5	21	1	2	2	1	1	1
7	1	5	22	1	1	2	2	0	0
7	1	5	23	1	1	0	0	0	0
7	1	5	24	1	1	1	1	0	0
7	1	5	25	1	2	0	0	0	0
7	1	5	26	1	2	2	1	1	1
7	1	5	27	1	1	1	1	0	1
7	1	5	28	1	2	2	1	0	0
7	1	5	29	1	2	2	1	0	0
7	1	5	30	1	2	2	1	0	0
7	1	5	31	1	2	1	2	0	0
7	1	5	32	1	2	2	1	1	0
7	1	6	1	2	1	1	1	1	1
7	1	6	2	2	1	1	1	1	1
7	1	6	3	2	2	2	1	0	0
7	1	6	4	2	2	1	2	1	1
7	1	6	5	2	1	1	1	0	0
7	1	6	6	2	2	2	1	1	0
7	1	6	7	2	2	0	0	0	0
7	1	6	8	2	2	2	1	0	0
7	1	6	9	2	1	1	1	1	0
7	1	6	10	2	1	1	1	1	1
7	1	6	11	2	1	1	1	0	0
7	1	6	12	2	2	1	2	0	0
7	1	6	13	2	2	2	1	0	0
7	1	6	14	2	1	0	0	1	0
7	1	6	15	2	1	2	2	1	1
7	1	6	16	2	1	1	1	1	1
7	1	6	17	2	1	2	2	0	0
7	1	6	18	2	2	2	1	0	0
7	1	6	19	2	2	1	2	0	0
7	1	6	20	2	2	0	0	1	0
7	1	6	21	2	1	1	1	0	0
7	1	6	22	2	1	0	0	0	0
7	1	6	23	2	2	2	1	1	1
7	1	6	24	2	2	1	2	1	1
7	1	6	25	2	2	2	1	1	1
7	1	6	26	2	2	2	1	1	1
7	1	6	27	2	1	1	1	0	0
7	1	6	28	2	2	2	1	0	0
7	1	6	29	2	2	2	1	1	1
7	1	6	30	2	1	2	2	0	0
7	1	6	31	2	1	1	1	0	0
7	1	6	32	2	1	2	2	1	1
7	1	7	1	1	1	1	1	0	0
7	1	7	2	1	2	2	1	1	0
7	1	7	3	1	2	2	1	0	0
7	1	7	4	1	2	1	2	1	0
7	1	7	5	1	1	0	0	1	0
7	1	7	6	1	2	2	1	0	0
7	1	7	7	1	1	2	2	1	1
7	1	7	8	1	1	1	1	0	0
7	1	7	9	1	2	0	0	1	0
7	1	7	10	1	1	1	1	1	1
7	1	7	11	1	2	1	2	1	1
7	1	7	12	1	1	1	1	0	1
7	1	7	13	1	1	1	1	0	0
7	1	7	14	1	2	2	1	1	1
7	1	7	15	1	2	0	0	0	0
7	1	7	16	1	1	1	1	0	0
7	1	7	17	1	1	2	2	1	0
7	1	7	18	1	2	2	1	1	1
7	1	7	19	1	1	1	1	1	1
7	1	7	20	1	2	2	1	0	0
7	1	7	21	1	2	2	1	0	0
7	1	7	22	1	2	1	2	0	0
7	1	7	23	1	1	1	1	1	0
7	1	7	24	1	1	2	2	0	0
7	1	7	25	1	2	2	1	1	0
7	1	7	26	1	1	0	0	0	0
7	1	7	27	1	1	1	1	1	0
7	1	7	28	1	2	2	1	0	1
7	1	7	29	1	1	2	2	0	0
7	1	7	30	1	2	2	1	1	1
7	1	7	31	1	2	1	2	0	0
7	1	7	32	1	1	1	1	1	1
7	1	8	1	2	2	2	1	0	0
7	1	8	2	2	1	1	1	0	1
7	1	8	3	2	1	1	1	1	1
7	1	8	4	2	1	1	1	1	1
7	1	8	5	2	1	2	2	0	0
7	1	8	6	2	2	2	1	0	1
7	1	8	7	2	1	1	1	1	1
7	1	8	8	2	2	2	1	0	0
7	1	8	9	2	1	1	1	1	0
7	1	8	10	2	1	0	0	0	0
7	1	8	11	2	1	2	2	1	0
7	1	8	12	2	2	2	1	1	1
7	1	8	13	2	2	1	2	1	1
7	1	8	14	2	2	0	0	0	0
7	1	8	15	2	2	1	2	0	0
7	1	8	16	2	2	2	1	0	0
7	1	8	17	2	2	2	1	1	1
7	1	8	18	2	1	1	1	0	1
7	1	8	19	2	1	1	1	1	1
7	1	8	20	2	2	2	1	1	1
7	1	8	21	2	1	1	1	0	0
7	1	8	22	2	2	1	2	0	0
7	1	8	23	2	2	2	1	1	0
7	1	8	24	2	1	2	2	0	0
7	1	8	25	2	1	0	0	1	0
7	1	8	26	2	2	2	1	1	0
7	1	8	27	2	1	2	2	1	1
7	1	8	28	2	1	1	1	0	0
7	1	8	29	2	2	1	2	1	1
7	1	8	30	2	2	0	0	1	0
7	1	8	31	2	2	2	1	0	0
7	1	8	32	2	1	1	1	0	0
8	1	1	1	1	2	2	1	0	0
8	1	1	2	1	1	1	1	0	0
8	1	1	3	1	2	2	1	1	1
8	1	1	4	1	2	2	1	1	1
8	1	1	5	1	1	2	2	1	1
8	1	1	6	1	2	2	1	0	1
8	1	1	7	1	2	2	1	0	0
8	1	1	8	1	1	1	1	0	0
8	1	1	9	1	1	2	2	0	0
8	1	1	10	1	1	1	1	1	0
8	1	1	11	1	2	2	1	1	0
8	1	1	12	1	1	1	1	1	0
8	1	1	13	1	1	0	0	0	0
8	1	1	14	1	2	1	2	1	0
8	1	1	15	1	2	2	1	0	0
8	1	1	16	1	2	0	0	0	0
8	1	1	17	1	2	2	1	0	0
8	1	1	18	1	1	2	2	1	1
8	1	1	19	1	2	0	0	1	0
8	1	1	20	1	2	1	2	0	0
8	1	1	21	1	1	1	1	1	0
8	1	1	22	1	1	1	1	0	0
8	1	1	23	1	2	2	1	1	0
8	1	1	24	1	1	0	0	1	0
8	1	1	25	1	1	1	1	1	0
8	1	1	26	1	1	2	2	0	0
8	1	1	27	1	1	1	1	0	0
8	1	1	28	1	1	1	1	1	0
8	1	1	29	1	2	1	2	0	0
8	1	1	30	1	2	2	1	1	0
8	1	1	31	1	1	1	1	0	0
8	1	1	32	1	2	1	2	1	0
8	1	2	1	2	1	1	1	0	0
8	1	2	2	2	1	1	1	0	0
8	1	2	3	2	2	2	1	0	0
8	1	2	4	2	1	1	1	1	0
8	1	2	5	2	1	1	1	1	0
8	1	2	6	2	2	2	1	1	0
8	1	2	7	2	2	2	1	0	0
8	1	2	8	2	1	2	2	0	0
8	1	2	9	2	1	1	1	1	0
8	1	2	10	2	2	1	2	0	0
8	1	2	11	2	2	2	1	1	0
8	1	2	12	2	1	2	2	1	0
8	1	2	13	2	2	2	1	1	0
8	1	2	14	2	1	1	1	1	0
8	1	2	15	2	1	1	1	0	0
8	1	2	16	2	1	1	1	0	0
8	1	2	17	2	2	0	0	0	0
8	1	2	18	2	2	0	0	1	0
8	1	2	19	2	2	2	1	1	0
8	1	2	20	2	2	2	1	1	0
8	1	2	21	2	2	1	2	1	1
8	1	2	22	2	2	2	1	0	0
8	1	2	23	2	2	1	2	0	0
8	1	2	24	2	1	1	1	1	0
8	1	2	25	2	1	2	2	1	0
8	1	2	26	2	1	1	1	0	0
8	1	2	27	2	1	0	0	1	0
8	1	2	28	2	2	1	2	1	0
8	1	2	29	2	1	0	0	0	0
8	1	2	30	2	2	2	1	0	0
8	1	2	31	2	2	2	1	0	0
8	1	2	32	2	1	2	2	0	0
8	1	3	1	1	2	2	1	1	0
8	1	3	2	1	2	2	1	0	0
8	1	3	3	1	1	1	1	0	0
8	1	3	4	1	1	0	0	0	0
8	1	3	5	1	1	1	1	0	0
8	1	3	6	1	1	2	2	1	0
8	1	3	7	1	1	1	1	1	0
8	1	3	8	1	2	1	2	0	0
8	1	3	9	1	1	1	1	0	0
8	1	3	10	1	2	0	0	1	0
8	1	3	11	1	1	1	1	1	0
8	1	3	12	1	1	1	1	1	0
8	1	3	13	1	2	2	1	1	0
8	1	3	14	1	2	2	1	0	0
8	1	3	15	1	1	1	1	1	0
8	1	3	16	1	2	2	1	0	0
8	1	3	17	1	2	1	2	1	0
8	1	3	18	1	2	2	1	0	0
8	1	3	19	1	2	2	1	1	0
8	1	3	20	1	1	2	2	1	0
8	1	3	21	1	2	2	1	1	0
8	1	3	22	1	1	2	2	0	0
8	1	3	23	1	1	0	0	1	0
8	1	3	24	1	1	1	1	0	0
8	1	3	25	1	2	1	2	1	0
8	1	3	26	1	2	0	0	0	0
8	1	3	27	1	2	1	2	0	0
8	1	3	28	1	2	2	1	0	0
8	1	3	29	1	1	2	2	0	0
8	1	3	30	1	2	2	1	1	0
8	1	3	31	1	1	1	1	1	0
8	1	3	32	1	1	1	1	0	0
8	1	4	1	2	2	2	1	1	0
8	1	4	2	2	1	1	1	1	0
8	1	4	3	2	2	2	1	1	0
8	1	4	4	2	2	1	2	0	1
8	1	4	5	2	1	1	1	0	0
8	1	4	6	2	1	0	0	0	0
8	1	4	7	2	1	1	1	0	0
8	1	4	8	2	2	0	0	0	0
8	1	4	9	2	2	1	2	1	1
8	1	4	10	2	1	1	1	1	0
8	1	4	11	2	1	2	2	0	0
8	1	4	12	2	2	2	1	0	0
8	1	4	13	2	1	1	1	1	0
8	1	4	14	2	1	2	2	1	0
8	1	4	15	2	1	1	1	0	0
8	1	4	16	2	1	1	1	0	0
8	1	4	17	2	2	1	2	1	0
8	1	4	18	2	2	2	1	0	0
8	1	4	19	2	2	2	1	0	0
8	1	4	20	2	2	2	1	0	0
8	1	4	21	2	2	2	1	1	1
8	1	4	22	2	2	1	2	0	0
8	1	4	23	2	2	2	1	1	1
8	1	4	24	2	1	1	1	0	0
8	1	4	25	2	1	0	0	1	0
8	1	4	26	2	2	2	1	1	0
8	1	4	27	2	1	1	1	1	0
8	1	4	28	2	2	2	1	0	0
8	1	4	29	2	1	1	1	1	0
8	1	4	30	2	1	2	2	1	0
8	1	4	31	2	2	0	0	1	0
8	1	4	32	2	1	2	2	0	0
8	1	5	1	1	1	1	1	1	0
8	1	5	2	1	2	2	1	1	0
8	1	5	3	1	1	1	1	0	0
8	1	5	4	1	1	0	0	0	0
8	1	5	5	1	1	1	1	1	1
8	1	5	6	1	1	2	2	1	1
8	1	5	7	1	1	1	1	1	1
8	1	5	8	1	2	0	0	0	0
8	1	5	9	1	2	1	2	0	0
8	1	5	10	1	1	1	1	0	0
8	1	5	11	1	2	1	2	1	1
8	1	5	12	1	2	2	1	0	1
8	1	5	13	1	2	1	2	0	1
8	1	5	14	1	1	1	1	1	1
8	1	5	15	1	2	2	1	0	0
8	1	5	16	1	1	2	2	1	1
8	1	5	17	1	1	1	1	0	0
8	1	5	18	1	1	2	2	0	0
8	1	5	19	1	2	2	1	1	0
8	1	5	20	1	2	2	1	0	0
8	1	5	21	1	1	2	2	0	0
8	1	5	22	1	1	1	1	0	0
8	1	5	23	1	2	2	1	0	0
8	1	5	24	1	2	0	0	1	0
8	1	5	25	1	1	0	0	1	0
8	1	5	26	1	2	2	1	1	0
8	1	5	27	1	2	2	1	1	0
8	1	5	28	1	2	2	1	0	0
8	1	5	29	1	2	1	2	1	0
8	1	5	30	1	2	2	1	1	1
8	1	5	31	1	1	1	1	0	0
8	1	5	32	1	1	1	1	1	0
8	1	6	1	2	2	2	1	0	0
8	1	6	2	2	2	2	1	0	0
8	1	6	3	2	1	1	1	0	0
8	1	6	4	2	1	0	0	1	0
8	1	6	5	2	1	2	2	1	0
8	1	6	6	2	2	2	1	0	0
8	1	6	7	2	1	2	2	0	0
8	1	6	8	2	2	2	1	1	0
8	1	6	9	2	1	2	2	0	0
8	1	6	10	2	1	1	1	0	0
8	1	6	11	2	1	1	1	0	0
8	1	6	12	2	2	0	0	1	0
8	1	6	13	2	2	1	2	0	0
8	1	6	14	2	2	2	1	1	0
8	1	6	15	2	2	2	1	0	0
8	1	6	16	2	2	1	2	0	0
8	1	6	17	2	1	1	1	1	0
8	1	6	18	2	2	2	1	0	0
8	1	6	19	2	2	1	2	1	0
8	1	6	20	2	2	0	0	0	0
8	1	6	21	2	1	1	1	1	0
8	1	6	22	2	2	2	1	1	0
8	1	6	23	2	1	1	1	1	1
8	1	6	24	2	1	1	1	0	0
8	1	6	25	2	1	0	0	0	0
8	1	6	26	2	2	2	1	1	1
8	1	6	27	2	1	1	1	1	0
8	1	6	28	2	1	1	1	0	0
8	1	6	29	2	1	2	2	1	0
8	1	6	30	2	2	2	1	1	0
8	1	6	31	2	1	1	1	1	0
8	1	6	32	2	2	1	2	1	0
9	1	1	1	1	1	1	1	0	0
9	1	1	2	1	2	2	1	1	1
9	1	1	3	1	1	1	1	1	1
9	1	1	4	1	2	1	2	1	1
9	1	1	5	1	2	2	1	1	0
9	1	1	6	1	2	2	1	0	0
9	1	1	7	1	2	0	0	0	0
9	1	1	8	1	2	2	1	1	1
9	1	1	9	1	1	1	1	0	1
9	1	1	10	1	1	2	2	1	0
9	1	1	11	1	1	1	1	1	1
9	1	1	12	1	1	1	1	0	0
9	1	1	13	1	1	1	1	0	0
9	1	1	14	1	2	2	1	1	1
9	1	1	15	1	1	1	1	1	0
[truncated: 4,338 more rows]

## Sheet: Sheet2
header for sheet 1
Column	variable name	values
A	subject_number	1-25
B	group	1=CD, 0=control
C	block	1-8
D	trial	1-32
E	condition	1=rhythm, 2=interval
F	cue_interval	1=short, 2=long
G	target_interval	1=short, 2=long, 0=catch
H	validity	1=valid, 2=invalid, 0=catch
I	target_orientation	1=horizontal, 0=vertical
J	orientation_judgment	1=horizontal, 0=vertical
